# Supplementary material
Source: ML conference proceedings conference paper supplement (https://proceedings.mlr.press/v108/rontsis20a.html)
Supplement: Supplementary file [file rontsis20a-supp.pdf]

---

# Optimal Approximation of Doubly Stochastic Matrices

## Supplementary Material

---

**Nikitas Rontsis**

Department of Engineering Science  
University of Oxford, OX1 3PJ, UK

**Paul J. Goulart**

Department of Engineering Science  
University of Oxford, OX1 3PJ, UK

### 1 Proof of Theorem 3.2

In this section we will prove Theorem 3.2 from the main paper, i.e. we will show that

$$A \operatorname{diag}(H_u \operatorname{vec}(D))A^T = S \odot (D + D^T) + \operatorname{diag}(S \odot (D + D^T)\mathbf{1})$$

where  $S$  ( $S_u$ ) is an integer  $(0 - 1)$  matrix representing the sparsity pattern of  $C$  ( $C_u$ ) and  $D$  is an upper triangular  $n \times n$  matrix.

Using the fact that  $H_u H_u^T = I$ , the definition of  $A$  and defining  $d := H_u \operatorname{vec} D$  we get

$$\begin{aligned} A \operatorname{diag}(d)A^T &= A \operatorname{diag}(\sqrt{d})H_u H_u^T \operatorname{diag}(\sqrt{d})A^T \\ &= \left( A \operatorname{diag}(\sqrt{d}) \operatorname{diag}(H_u) \right) \left( A \operatorname{diag}(\sqrt{d}) \operatorname{diag}(H_u) \right)^T \end{aligned}$$

where  $\sqrt{d}$  denotes the element-wise square root of  $d$ . Recalling that  $A = A_1 + A_2$  we have

$$A \operatorname{diag}(\sqrt{d}) \operatorname{diag}(H_u) = \underbrace{A_1 \operatorname{diag}(\sqrt{d}) \operatorname{diag}(H_u)}_{:=B_1} + \underbrace{A_2 \operatorname{diag}(\sqrt{d}) \operatorname{diag}(H_u)}_{:=B_2}$$

thus

$$A \operatorname{diag}(d)A^T = \begin{bmatrix} I_n & \\ & I_n \end{bmatrix} \begin{bmatrix} B_1 \\ B_2 \end{bmatrix} \begin{bmatrix} B_1 \\ B_2 \end{bmatrix}^T \begin{bmatrix} I_n \\ I_n \end{bmatrix}$$

We now focus on the first part of the above symmetric product, To this end, define  $\sqrt{s}_i$  the  $i^{\text{th}}$  column of  $S_u \odot \sqrt{D}$  where  $\sqrt{D}$  denotes the element-wise square root of  $D$ . Using the fact that

$H_u^T \text{diag}(x)H_u = \text{diag}(\text{vec}(S_u) \odot (H_u^T x))$  for any vector  $x$  of appropriate dimensions we get

$$\begin{aligned} H_u^T \text{diag}(\sqrt{d})H_u &= \text{diag}(\text{vec}(S_u) \odot (H_u^T \sqrt{d})) = \text{diag}(\text{vec}(S_u) \odot (H_u^T H \text{vec}(\sqrt{D}))) \\ &= \text{diag}(\text{vec}(S_u \odot S_u \odot \sqrt{D})) = \text{diag}(\text{vec}(S_u \odot \sqrt{D})). \end{aligned} \quad (1)$$

Use the definitions of  $A_1, A_2$  and (1) to get

$$\begin{aligned} \begin{bmatrix} B_1 \\ B_2 \end{bmatrix} &= \begin{bmatrix} \mathbf{1}^T \otimes I \\ I \otimes \mathbf{1}^T \end{bmatrix} H_u^T \text{diag}(d)H_u = \begin{bmatrix} I & \cdots & I \\ \mathbf{1}^T & & \\ & \ddots & \\ & & \mathbf{1}^T \end{bmatrix} \begin{bmatrix} \text{diag}(\sqrt{s_1}) & & \\ & \ddots & \\ & & \text{diag}(\sqrt{s_n}) \end{bmatrix} \\ &= \begin{bmatrix} \text{diag}(\sqrt{s_1}) & \cdots & \text{diag}(\sqrt{s_n}) \\ \sqrt{s_1}^T & & \\ & \ddots & \\ & & \sqrt{s_n}^T \end{bmatrix} \end{aligned}$$

We can then form the symmetric product of this matrix with itself to obtain

$$\begin{bmatrix} B_1 \\ B_2 \end{bmatrix} \begin{bmatrix} B_1 \\ B_2 \end{bmatrix}^T = \begin{bmatrix} \text{diag}(\sqrt{s_1}) & \cdots & \text{diag}(\sqrt{s_n}) \\ \sqrt{s_1}^T & & \\ & \ddots & \\ & & \sqrt{s_n}^T \end{bmatrix} \begin{bmatrix} \text{diag}(\sqrt{s_1}) & \sqrt{s_1} & \\ \vdots & \ddots & \\ \text{diag}(\sqrt{s_n}) & & \sqrt{s_n} \end{bmatrix}$$

or, noting that  $\sqrt{s_i}^T \sqrt{s_i} = \mathbf{1}^T s_i$ ,  $\text{diag}^2(\sqrt{s_i}) = \text{diag}(s_i)$ ,  $\text{diag}(\sqrt{s_i})\sqrt{s_i} = s_i$  where  $s_i$  denotes the  $i$ -th column of  $S_u \odot \text{mat}(d)$ ,

$$\begin{bmatrix} B_1 \\ B_2 \end{bmatrix} \begin{bmatrix} B_1 \\ B_2 \end{bmatrix}^T = \begin{bmatrix} \text{diag}(\sum_i s_i) & s_1 & \cdots & s_n \\ s_1^T & \mathbf{1}^T s_1 & & \\ \vdots & & \ddots & \\ s_n^T & & & \mathbf{1}^T s_n \end{bmatrix} = \begin{bmatrix} \text{diag}((S_u \odot D)\mathbf{1}) & (S_u \odot D) \\ (S_u \odot D)^T & \text{diag}((S_u \odot D)^T \mathbf{1}) \end{bmatrix}.$$

Thus

$$\begin{aligned} A \text{diag}(d)A^T &= \begin{bmatrix} I & I \\ & \end{bmatrix} \begin{bmatrix} B_1 \\ B_2 \end{bmatrix} \begin{bmatrix} B_1^T & B_2^T \end{bmatrix} \begin{bmatrix} I \\ I \end{bmatrix} \\ &= \text{diag}((S_u \odot D)\mathbf{1}) + (S_u \odot D) + (S_u \odot D)^T + \text{diag}((S_u \odot D)^T \mathbf{1}) \end{aligned}$$

or, recalling that  $D$  is upper triangular,

$$A \text{diag}(H_u \text{vec}(D))A^T = S \odot (D + D^T) + \text{diag}(S \odot (D + D^T)).$$

## 2 Detailed Results for the SuiteSparse Matrices

In this Section we provide detailed results for §4.3 of the main paper.

Table 1: Results of Algorithm 1 for Undirected Weighted Graph Matrices from the SuiteSparse collection. A tolerance of  $10^{-4}$  is used for the termination of our Algorithm. The timings are in seconds and they are compared against the solution times of Gurobi with its default settings (on  $\mathcal{P}1$ ). Hardware used: a single thread running on an Intel Gold 5120 with 192GB of memory.

| Problem Name    | $n$     | $n_{\text{nz}}$ | $t_{\text{admm}}$     | $t_{\text{gurobi}}$   |
|-----------------|---------|-----------------|-----------------------|-----------------------|
| GD97_b          | 47      | 311             | $1.14 \times 10^{-3}$ | $4.07 \times 10^{-2}$ |
| Journals        | 124     | 12 068          | $1.24 \times 10^{-2}$ | $7.80 \times 10^{-2}$ |
| MISKnowledgeMap | 2427    | 59 449          | $8.75 \times 10^{-2}$ | 1.47                  |
| Sandi_authors   | 86      | 334             | $1.17 \times 10^{-3}$ | $3.87 \times 10^{-2}$ |
| Stranke94       | 10      | 100             | $6.40 \times 10^{-4}$ | $9.81 \times 10^{-3}$ |
| USAir97         | 332     | 4584            | $5.26 \times 10^{-3}$ | $3.27 \times 10^{-2}$ |
| ak2010          | 45 292  | 262 390         | $4.60 \times 10^{-1}$ | 2.22                  |
| al2010          | 252 266 | 1 482 748       | 2.87                  | $1.61 \times 10^1$    |
| ar2010          | 186 211 | 1 090 521       | 1.39                  | $1.17 \times 10^1$    |
| astro-ph        | 16 706  | 259 208         | $9.47 \times 10^{-1}$ | $2.31 \times 10^1$    |
| az2010          | 241 666 | 1 437 760       | 2.71                  | $1.45 \times 10^1$    |
| ca2010          | 710 145 | 4 199 511       | 5.65                  | $5.57 \times 10^1$    |
| co2010          | 201 062 | 1 175 636       | 2.19                  | $1.24 \times 10^1$    |
| cond-mat-2003   | 31 163  | 271 221         | 1.12                  | $3.26 \times 10^1$    |
| cond-mat-2005   | 40 421  | 391 803         | 2.31                  | $9.90 \times 10^1$    |
| cond-mat        | 16 726  | 111 914         | $1.90 \times 10^{-1}$ | 3.35                  |
| ct2010          | 67 578  | 403 930         | $5.07 \times 10^{-1}$ | 3.76                  |
| de2010          | 24 115  | 140 171         | $1.23 \times 10^{-1}$ | 1.21                  |
| fl2010          | 484 481 | 2 830 775       | 5.20                  | $3.04 \times 10^1$    |
| ga2010          | 291 086 | 1 709 142       | 3.18                  | $2.10 \times 10^1$    |
| geom            | 7343    | 31 139          | $1.21 \times 10^{-1}$ | $2.49 \times 10^{-1}$ |
| hep-th          | 8361    | 39 863          | $6.28 \times 10^{-2}$ | $5.76 \times 10^{-1}$ |
| hi2010          | 25 016  | 149 142         | $2.82 \times 10^{-1}$ | 1.25                  |
| human_gene1     | 22 283  | 24 669 643      | $2.47 \times 10^2$    | $8.94 \times 10^3$    |
| human_gene2     | 14 340  | 18 068 388      | $1.21 \times 10^2$    | $3.36 \times 10^3$    |
| ia2010          | 216 007 | 1 237 177       | 2.78                  | $1.69 \times 10^1$    |
| id2010          | 149 842 | 878 106         | 1.01                  | 8.30                  |
| il2010          | 451 554 | 2 616 018       | 5.14                  | $3.70 \times 10^1$    |

Table 1: Continued.

| Problem Name  | $n$     | $n_{\text{nz}}$ | $t_{\text{admm}}$     | $t_{\text{gurobi}}$   |
|---------------|---------|-----------------|-----------------------|-----------------------|
| in2010        | 267 071 | 1 548 787       | 3.00                  | $1.92 \times 10^1$    |
| ks2010        | 238 600 | 1 360 398       | 2.58                  | $1.69 \times 10^1$    |
| ky2010        | 161 672 | 949 450         | 1.14                  | 9.44                  |
| la2010        | 204 447 | 1 185 081       | 5.54                  | $1.40 \times 10^1$    |
| lesmis        | 77      | 585             | $8.87 \times 10^{-3}$ | $4.28 \times 10^{-2}$ |
| ma2010        | 157 508 | 934 118         | 1.08                  | 9.49                  |
| md2010        | 145 247 | 845 625         | $9.59 \times 10^{-1}$ | 8.17                  |
| me2010        | 69 518  | 404 994         | $4.99 \times 10^{-1}$ | 3.69                  |
| mi2010        | 329 885 | 1 907 975       | 3.60                  | $2.53 \times 10^1$    |
| mn2010        | 259 777 | 1 486 879       | 2.89                  | $1.95 \times 10^1$    |
| mo2010        | 343 565 | 2 000 133       | 3.84                  | $2.57 \times 10^1$    |
| mouse_gene    | 45 101  | 28 967 291      | $5.97 \times 10^2$    | $3.52 \times 10^4$    |
| ms2010        | 171 778 | 1 011 758       | 3.78                  | $1.12 \times 10^1$    |
| mt2010        | 132 288 | 770 956         | $9.05 \times 10^{-1}$ | 7.16                  |
| nc2010        | 288 987 | 1 705 607       | 3.05                  | $1.88 \times 10^1$    |
| nd2010        | 133 769 | 759 715         | 1.35                  | 9.30                  |
| ne2010        | 193 352 | 1 107 206       | 2.03                  | $1.35 \times 10^1$    |
| netscience    | 1589    | 7073            | $1.36 \times 10^{-2}$ | $8.19 \times 10^{-2}$ |
| nh2010        | 48 837  | 283 387         | $3.87 \times 10^{-1}$ | 2.46                  |
| nj2010        | 169 588 | 999 500         | 1.23                  | $1.02 \times 10^1$    |
| nm2010        | 168 609 | 999 579         | 1.61                  | 9.92                  |
| nopoly        | 10 774  | 70 842          | $7.05 \times 10^{-2}$ | $5.35 \times 10^{-1}$ |
| nv2010        | 84 538  | 501 536         | $4.66 \times 10^{-1}$ | 4.61                  |
| ny2010        | 350 169 | 2 059 713       | 3.66                  | $2.29 \times 10^1$    |
| oh2010        | 365 344 | 2 133 584       | 3.93                  | $2.88 \times 10^1$    |
| ok2010        | 269 118 | 1 543 266       | 2.83                  | $1.68 \times 10^1$    |
| or2010        | 196 621 | 1 176 133       | 1.44                  | $1.22 \times 10^1$    |
| pa2010        | 421 545 | 2 480 007       | 4.80                  | $2.76 \times 10^1$    |
| rgg_n_2_15_s0 | 32 768  | 353 248         | $3.44 \times 10^{-1}$ | 2.69                  |
| ri2010        | 25 181  | 150 931         | $1.42 \times 10^{-1}$ | 1.29                  |
| sc2010        | 181 908 | 1 075 068       | 1.30                  | $1.12 \times 10^1$    |
| sd2010        | 88 360  | 499 082         | $9.10 \times 10^{-1}$ | 5.57                  |
| tn2010        | 240 116 | 1 434 082       | 1.77                  | $1.53 \times 10^1$    |
| tx2010        | 914 231 | 5 370 503       | $1.00 \times 10^1$    | $7.65 \times 10^1$    |

Table 1: Continued.

| Problem Name | $n$     | $n_{\text{nz}}$ | $t_{\text{admm}}$     | $t_{\text{gurobi}}$ |
|--------------|---------|-----------------|-----------------------|---------------------|
| ut2010       | 115 406 | 687 472         | $9.04 \times 10^{-1}$ | 6.15                |
| va2010       | 285 762 | 1 687 890       | 1.99                  | $1.69 \times 10^1$  |
| vt2010       | 32 580  | 188 178         | $2.98 \times 10^{-1}$ | 1.58                |
| wa2010       | 195 574 | 1 143 006       | 2.05                  | $1.25 \times 10^1$  |
| wi2010       | 253 096 | 1 462 500       | 3.21                  | $1.98 \times 10^1$  |
| wv2010       | 135 218 | 798 140         | $9.75 \times 10^{-1}$ | 7.99                |
| wy2010       | 86 204  | 513 790         | $4.89 \times 10^{-1}$ | 4.93                |
